# Supplementary material
Source: Springer Nature journal article supplement (https://www.springermedizin.de/resource/supplementary/13041_2008_6_MOESM7_ESM.pdf/25657362)
Supplement: MOESM7 [file 25657362]

A

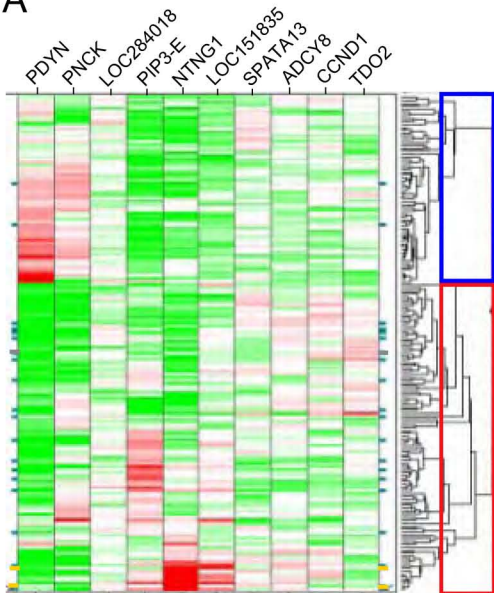

■ schizophrenia (n=18)  
 ■ schizoaffective disorder (n=1)  
 ■ bipolar disorder (n=2)

## Cluster A

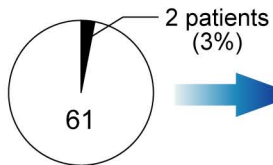

30 controls  
in control-enriched cluster  
with no CNS-related illness

## Cluster B

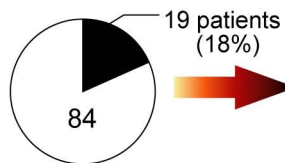

19 patients  
in schizophrenia-enriched cluster  
schizophrenia: 16  
schizoaffective disorder: 1  
bipolar disorder: 2

■ schizophrenia, schizoaffective disorder, & bipolar disorder  
 □ donors without schizophrenic or its related psychiatric diagnosis

B

26 probes

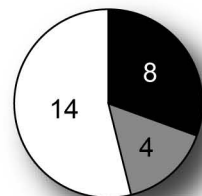

■ neurogenesis-related genes  
 ■ cell-maturation/migration-related genes

a.  $p < 0.01$ , fold change  $> 2.0$   
 b. present  $> 75\%$  in at least one cluster  
 c. not affected by gender or age
